# Supplementary material
Source: ML conference proceedings conference paper supplement (https://openreview.net/forum?id=4x2RUQ99sGz)
Supplement: supplementary_material [file attachment]

# Supplementary Document: Online Model Adaptation with Feedforward Compensation

Anonymous Author(s)

Affiliation

Address

email

## 1 A Lemma 1: Error Bound of Online Adaptation

2 In this section, we establish the error bound for prediction errors in the general online adaptation.  
 3 At time step  $t$ , we select the critical input-output pairs  $(X_s, y_{s+1})$  from recent  $L$ -steps observa-  
 4 tions. These critical pairs are utilized to update the parameters of the prediction model, resulting in a  
 5 refined model. Subsequently, predictions are made using the newly optimized parameters.

6 Assuming that the transition function  $f : X_t \rightarrow Y_{t+1}$  satisfies the  $K$ -Lipschitz continuity condition  
 7 and the  $\delta$  time-varying condition.

8 **Bound of ground-truth difference.** Given a transition function  $f(t, X)$ , if the  $K$ -Lipschitz conti-  
 9 nuity and  $\delta$  time-varying conditions holds within recent  $L$  steps, then the ground-truth value  $Y_{t+1}$   
 10 and  $Y_{s+1}$  has the following property:

$$\|Y_{t+1} - Y_{s+1}\| = \|f(t, X_t) - f(s, X_s)\| \leq K\|X_t - X_s\| + \delta\|t - s\| \quad (1)$$

11 The proof is shown below:

$$\begin{aligned} \|Y_{t+1} - Y_{s+1}\| &= \|f(t, X_t) - f(s, X_s)\| \\ &= \|f(t, X_t) - f(t, X_s) + f(t, X_s) - f(s, X_s)\| \\ &\leq \|f(t, X_t) - f(t, X_s)\| + \|f(t, X_s) - f(s, X_s)\| \quad (\text{triangle inequality}) \\ &\leq K\|X_t - X_s\| + \|f(t, X_s) - f(s, X_s)\| \quad (K \text{ Lipschitzness}) \\ &\leq K\|X_t - X_s\| + \delta\|t - s\| \quad (\delta \text{ time varying}) \end{aligned} \quad (2)$$

12 **Error Bound of Online Adaptation.** For time step  $t$ , the (prior) prediction error  $e_{t+1}$  has the  
 13 following inequality:

$$\begin{aligned} e_{t+1} &= \|Y_{t+1} - \hat{Y}_{t+1}\| = \|Y_{t+1} - \hat{f}(\theta_t, X_t)\| \\ &= \|Y_{t+1} - Y_{s+1} + Y_{s+1} - \hat{f}(\theta_t, X_s) + \hat{f}(\theta_t, X_s) - \hat{f}(\theta_t, X_t)\| \\ &\leq \|Y_{t+1} - Y_{s+1}\| + \|Y_{s+1} - \hat{f}(\theta_t, X_s)\| + \|\hat{f}(\theta_t, X_s) - \hat{f}(\theta_t, X_t)\| \quad (\text{triangle inequality}) \\ &\leq K\|X_t - X_s\| + \delta\|t - s\| + \|Y_{s+1} - \hat{f}(\theta_t, X_s)\| + \|\hat{f}(\theta_t, X_s) - \hat{f}(\theta_t, X_t)\| \end{aligned} \quad (3)$$

14 The first two terms come from the difference between ground-truth  $Y_{t+1} - Y_{s+1}$ , the third term  
 15 is a (posterior) fitting error for input-output tuple  $(X_s, Y_{s+1})$ , and the last term is the difference  
 16 between two predictions. Combining the above inequality with the Lipschitz continuity condition  
 17 for  $\hat{f}(\theta_t, X_t)$ , we obtain the error bound for general online adaptation is shown below:

$$e_{t+1} \leq (K + \hat{K})\|X_t - X_s\| + \delta\|t - s\| + \|Y_{s+1} - \hat{f}(\theta_t, X_s)\| \quad (4)$$

18 Then lemma 1 is derived.

## 19 B Comparison of Error Bound between Feedforward Adaptation and 20 Feedback Adaptation

### 21 B.1 Lemma 2 (a,b,c): Expected Error Bound

22 Considering the error bound (4), the first two terms are associated with the specific data compensa-  
23 tion strategy, while the last term represents the posterior fitting error on the selected samples. In this  
24 study, our main focus is on the data compensation strategy, and we do not prioritize the data fitting  
25 aspect. Additionally, with a powerful neural network prediction model, achieving a very small fit-  
26 ting error (almost zero) is relatively straightforward [1]. Therefore, we can disregard the fitting error  
27 when comparing feedforward and feedback adaptation. By neglecting the fitting error, we obtain an  
28 approximate upper bound  $B_e$  for general online adaptation, as shown below:

$$B_e = (K + \hat{K})\|X_t - X_s\| + \delta|t - s| \quad (5)$$

29 **Error Bound for Feedforward Adaptation.** In feedforward adaptation, the selected input-output  
30 pairs are the most similar samples to the current observation  $X_s = \arg \min_{X_i} \|X_t - X_i\|$  from  
31  $L$ -size buffer, and  $s = \arg \min_{i \in [t-L, t-1]} \|X_t - X_i\|$ . Then we have an error bound  $B_e^{ff}$  for  
32 feedforward adaptation:

$$B_e^{ff} = (K + \hat{K})\|X_t - X_s\| + \delta|t - s| \leq (K + \hat{K})\|X_t - X_s\| + \delta L \quad (6)$$

$$X_s = \arg \min_{X_i \in [X_{t-L}, X_{t-1}]} \|X_t - X_i\| \quad (7)$$

33 **Error Bound for Feedback Adaptation.** In feedback adaptation, the selected input-output pairs are  
34 the latest observations  $X_s = X_{t-1}$  and  $s = t - 1$ . Then we have an error bound  $B_e^{fb}$  for feedback  
35 adaptation:

$$B_e^{fb} = (K + \hat{K})\|X_t - X_{t-1}\| + \delta \quad (8)$$

36 **Comparison of the expected error bound between Feedforward and Feedback Adaptation.** Let  
37 the expected distance between consecutive samples is  $D$ :

$$D := E[\|X_t - X_{t-1}\|]. \quad (9)$$

38 Let the expected minimum sample distance is  $D^*$ :

$$D^* := E[\|X_t - X_s\|] = E[\min_{X_i} \|X_t - X_i\|]. \quad (10)$$

39 Then the expected error bound for feedforward adaptation is:

$$E[B_e^{ff}] \leq (K + \hat{K})E[\|X_t - X_s\|] + \delta L = (K + \hat{K})D^* + \delta L. \quad (11)$$

40 The expected error bound for feedback adaptation is:

$$E[B_e^{fb}] = (K + \hat{K})E[\|X_t - X_{t-1}\|] + \delta = (K + \hat{K})D + \delta. \quad (12)$$

41 Consider the conditions that feedforward adaptation has a smaller error bound than feedback adap-  
42 tation in expectation. In order to make:  $E[B_e^{ff}] < E[B_e^{fb}]$ , we have:

$$(K + \hat{K})D^* + \delta L < (K + \hat{K})D + \delta \quad (13)$$

$$\Rightarrow \frac{\delta}{K + \hat{K}} < \frac{D - D^*}{L - 1} \quad (14)$$

43 Equation (14) represents the condition under which feedforward adaptation surpasses feedback  
44 adaptation in terms of the expected error bound. Here, the hyperparameter  $L$  denotes the prede-  
45 fined buffer size. It is important to note that when  $L = 1$ , feedforward adaptation is equivalent to  
46 feedback adaptation. Therefore, our focus is primarily on the case when  $L > 1$ . From the equation,  
47 we observe that if the system exhibits a smaller time-varying property  $\delta$  compared to the Lipschitz  
48 constant  $K$ , and a smaller minimum sample distance  $D^*$ , feedforward adaptation is more likely  
49 to achieve a greater improvement over feedback adaptation. For instance, when  $\delta = 0$ , we have  
50  $E[B_e^{ff}] < E[B_e^{fb}]$  for any  $K, \hat{K}, D, D^*$ , and  $L$ .

51 By combining (11), (12) and (14), we can conclude Lemma 2 (a,b,c).

## 52 B.2 Lemma 2 (d): Expected Error Bound on Random-input System

53 Consider a transition function  $f$  with randomly sampled input observations. Specifically, input  $X_t$   
 54 is a random variable sampled from the uniform distribution:  $X_t \sim \mathcal{U}(0, 1)$ . In this case, the current  
 55 sample  $X_t$  and last sample  $X_{t-1}$  are independent random variables from  $\mathcal{U}(0, 1)$ . According to [2],  
 56 the expectation of the distance between these two independent and uniform-distributed variables is  
 57  $\frac{1}{3}$ . Then for feedback adaptation

$$E[\|X_t - X_{t-1}\|] = \frac{1}{3}, \text{ for } X_t, X_{t-1} \sim \mathcal{U}(0, 1) \quad (15)$$

58 The term  $E[\min_{X_i} \|X_t - X_i\|]$  represents the expected minimum distance between the current  
 59 sample  $X_t$  and previous  $L$  samples in the buffer, which is  $\frac{1}{L+2}$  [2], according to [2]. Then for  
 60 feedforward adaptation:

$$E[\|X_t - X_s\|] = E[\min_{X_i \in [X_{t-L}, X_{t-1}]} \|X_t - X_i\|] = \frac{1}{L+2}, \text{ for } X_t, X_i \sim \mathcal{U}(0, 1) \quad (16)$$

61 Let  $D = \frac{1}{3}$ ,  $D^* = \frac{1}{L+2}$  on the expected error bound (11) and (12), we obtain the expected error  
 62 bound for feedforward and feedback adaptation on the system with random input:

$$E[B_e^{ff}] = (K + \hat{K})D^* + \delta L = \frac{K + \hat{K}}{L+2} + \delta L \quad (17)$$

$$E[B_e^{fb}] = (K + \hat{K})D + \delta = \frac{K + \hat{K}}{3} + \delta \quad (18)$$

63 Consider the conditions that feedforward adaptation has a smaller error bound than feedback adap-  
 64 tation in expectation. In order to make:  $E[B_e^{ff}] < E[B_e^{fb}]$ , we have:

$$(K + \hat{K})D^* + \delta L < (K + \hat{K})D + \delta \quad (19)$$

$$\Rightarrow \frac{K + \hat{K}}{L+2} + \delta L < \frac{K + \hat{K}}{3} + \delta \quad (20)$$

$$\Rightarrow \frac{\delta}{K + \hat{K}} < \frac{1}{3L+6} \quad (21)$$

65 If  $L = 1$ , the feedforward adaptation is equal to the feedback adaptation. For feedforward adapta-  
 66 tion, we have  $L > 1$ . Then we consider the buffer size  $L = 2$  as general settings, then conclude the  
 67 conditions for applying feedforward adaptation:

$$\frac{\delta}{K + \hat{K}} < \frac{1}{3L+6} = \frac{1}{12} \approx 0.083 \quad (22)$$

68 In this case, with the optimal buffer size  $L = L^* := \sqrt{\frac{K+\hat{K}}{\delta}} - 2$ , feedforward adaptation achieves  
 69 the smallest expected error bound:

$$E[B_e^{ff}]^* = 2\sqrt{\delta(K + \hat{K})} - 2\delta \quad (23)$$

70 As can be seen, if  $\delta \approx 0$ , feedforward adaptation could achieve the zero expected error bound with  
 71 optimal buffer size  $L^*$ , while feedback adaptation cannot converge to zero expected error bound.

72 Thus, given a prediction system  $f$  with a random input state, if  $\frac{\delta}{K+\hat{K}} < \frac{1}{12}$ , with buffer size  $L = 2$ ,  
 73 feedforward adaptation achieves the smaller expected error bound than feedback adaptation. In this  
 74 case, the optimal buffer size for minimum error bound is  $L^* = \sqrt{\frac{K+\hat{K}}{\delta}} - 2$ .

75 By combining (17), (18), (22) and (23), one can conclude Lemma 2 (d).

## 76 B.3 Synthetic Experiments: Linear Time-varying System

77 We design a toy experiment to evaluate Lemma 2. We consider the following linear time-varying  
 78 system

$$y_{t+1} = f(x_t) = \sin x_t + \delta t, \quad x_t \sim \mathcal{U}(0, 1)$$

79 Our parameterized prediction model is a one-layer perception with Sigmoid activation function.

$$\hat{y}_t = \hat{f}(V_t, b_t; x_t) = S(V_t x_t) + b_t = \frac{1}{1 + e^{-V_t x_t}} + b_t \quad (24)$$

80 Where  $S(\cdot)$  denotes a Sigmoid activation function. We have The Lipschitz constant  $K$  and  $\hat{K}$  for  
81 the ground-truth function  $f$  and the one-layer perception  $\hat{f}$ :

$$K = \sup \left| \frac{\partial f}{\partial x_t} \right| = \sup |\cos(x_t)| = 1 \quad (25)$$

$$\hat{K} = \sup \left( \left| \frac{\partial \hat{f}}{\partial x_t} \right| \right) = \sup |V_t \cdot S(V_t x_t) \cdot (1 - S(V_t x_t))| = 0.25 \sup |V_t| \quad (26)$$

82 We use SGD as an optimizer in feedback and feedforward adaptation. During training, we keep the  
83  $\|V_t\|$  bounded, i.e.  $\|V_t\| \leq 1$ , then  $\hat{K} = 0.25$ . We use Lemma 3 (17) and (18) to calculate the error  
84 bound for feedback and feedforward adaptation:

$$E[B_e^{fb}] = \frac{5}{12} + \delta \quad (27)$$

$$E[B_e^{ff}] = \frac{5}{4L + 8} + \delta L \quad (28)$$

85 Then we calculate the threshold  $\delta^*$  (22). If  $\delta \leq \delta^*$ , feedforward adaptation has a smaller error  
86 bound.

$$\frac{\delta^*}{K + \hat{K}} = \frac{1}{12} \quad (29)$$

$$\Rightarrow \delta^* = \frac{1}{12}(K + \hat{K}) \approx 0.1 \quad (30)$$

87 Thus, in the toy experiment, If  $\delta \leq 0.1$ , feedforward adaptation has a smaller error bound. The  
88 experimental results are shown in Figure 1 of the main paper.

## 89 C Applications of Feedforward Adaptation

90 When determining whether to apply feedforward adaptation to a system or time-series function,  
91 Lemma 2(c) can serve as a criterion. However, estimating the values of  $\delta, K, D, D^*$  for the system  
92 is required. As a straightforward and conservative approach, if  $\delta \approx 0$ , feedforward adaptation  
93 outperforms feedback adaptation for any  $\delta, K, D, D^*$ . To simplify this decision-making process, we  
94 propose a simple criterion based on the widely used stationarity test in time-series analysis.

### 95 C.1 Stationary time series and ADF test

96 A stationary time series is one that exhibits properties that do not depend on time. Therefore, a sta-  
97 tionary time series does not possess trends or seasonality. In the context of a time series  $(X_t, Y_{t+1})$ ,  
98 stationarity implies that the transition function  $f : X_t \rightarrow Y_{t+1}$  is not explicitly linked to the time  
99 step  $t$ . In accordance with the  $\delta$  time-varying condition, which is equivalent to  $\delta \approx 0$ .

100 The Augmented Dickey-Fuller (ADF) test is a widely used method for detecting the stationarity of a  
101 time series [3]. It tests the null hypothesis that a time series is non-stationary or time-dependent (i.e.,  
102 it has a unit root), while the alternative hypothesis suggests stationarity, indicating that it cannot be  
103 represented by a unit root. The ADF test yields a p-value that is used to assess the test. If the p-value  
104 is less than 0.05, we reject the null hypothesis and conclude that the series is stationary. Conversely,  
105 if the p-value is greater than or equal to 0.05, we fail to reject the null hypothesis and conclude that  
106 the series is non-stationary.

### 107 C.2 Differencing

108 In many real-world scenarios, time series signals exhibit non-stationarity. Therefore, it is crucial to  
109 transform these non-stationary signals into stationary ones in order to apply feedforward adaptation

effectively. One approach to achieve this is by computing the differences between consecutive observations, denoted as  $d_{t+1} = Y_{t+1} - Y_t$ . This process is commonly referred to as differencing [4]. Differencing helps stabilize the mean of a time series by eliminating changes in its level and removing trends. By applying differencing, it becomes possible to convert many non-stationary series into stationary ones, thereby facilitating the use of feedforward adaptation

### C.3 Criterion for applying feedforward adaptation

The criterion and procedure for applying feedforward adaptation are presented in Figure 2 of the main paper. In this approach, given a time series  $(X_t, Y_{t+1})$ , such as the training set of the prediction task  $f : X_t \rightarrow Y_{t+1}$ , we follow a specific process based on the stationarity of the series. If the ADF test indicates that the series is stationary, we directly apply feedforward adaptation to the original series. This involves prediction and adaptation on  $Y_{t+1} = f(t, X_t)$ . If the series is found to be non-stationary, we employ differencing by calculating the difference between consecutive observations, denoted as  $d_{t+1} = Y_{t+1} - Y_t$ . We then assess the stationarity of the differenced signal  $d_{t+1}$ . If it is determined to be stationary, we proceed with feedforward adaptation on the difference series. This entails prediction and adaptation on  $d_{t+1}$ , followed by converting it back to  $Y_{t+1} = Y_t + d_{t+1}$  based on the value of  $Y_t$ . If the differenced signal remains non-stationary even after differencing, we resort to feedback adaptation for handling the non-stationary signal.

## D Additional Details of Experiments

### D.1 Dataset

We evaluate the effectiveness of the proposed feedforward adaptation method in three different scenarios: (1) Human motion prediction in human-robot collaboration, using the THOR dataset and Assembly dataset; (2) Vehicle trajectory prediction in autonomous driving, using the NGSIM dataset; and (3) Robotic arm trajectory prediction for quality control and monitoring purposes, using the Robot arm trajectory dataset. The specific tasks for each dataset are illustrated in Fig. 1.

The description of the datasets is shown below.

- **THOR**<sup>1</sup> is a public dataset of human motion trajectories, recorded in a controlled indoor experiment [5]. Which includes the motion trajectories with diverse and accurate social human motion data in a shared indoor environment. In our experiments, we use No. 2 ~ 4 agent’s trajectory as a train set and No. 5 ~ 10 agent’s trajectory as a test set.
- **Assembly** dataset<sup>2</sup> records arm motions in assembly tasks. This dataset includes 5 different assembly tasks. Each task requires the human to use LEGO pieces to assemble an object. In our experiments, we use task 1 ~ 2 as a train set and task 3 ~ 5 as a test set.
- **NGSIM** dataset: US 101 human driving data from Next Generation SIMulation dataset<sup>3</sup>. The dataset contains highway driving trajectories captured by cameras mounted on top of surrounding buildings [6]. In our experiment, we use a subset of the dataset which contains 100 trials of different agents. We use No. 1 ~ 50 trial’s trajectory as a train set and No. 50 ~ 100 trial’s trajectory as a test set.
- We collect the **Robot arm trajectory** dataset, which records the joint position (Denavit–Hartenberg parameters) of the KINOVA Gen 3 (7 DoF) robotic arm in pick-and-place tasks. This dataset includes 4 pick-and-place tasks for picking objects from different positions on a workbench. In our experiments, we use task 1 ~ 2 as a train set and task 2 ~ 4 as a test set. We will make the dataset publicly available.

In our experiments, the prediction model utilizes the most recent 1 second of observations to predict the trajectory for the next 2 seconds. To ensure consistent sampling frequencies, we subsampled the

<sup>1</sup><http://thor.oru.se/>

<sup>2</sup>[https://github.com/intelligent-control-lab/Human\\_Assembly\\_Data](https://github.com/intelligent-control-lab/Human_Assembly_Data)

<sup>3</sup><https://www.fhwa.dot.gov/publications/research/operations/07030/index.cfm>

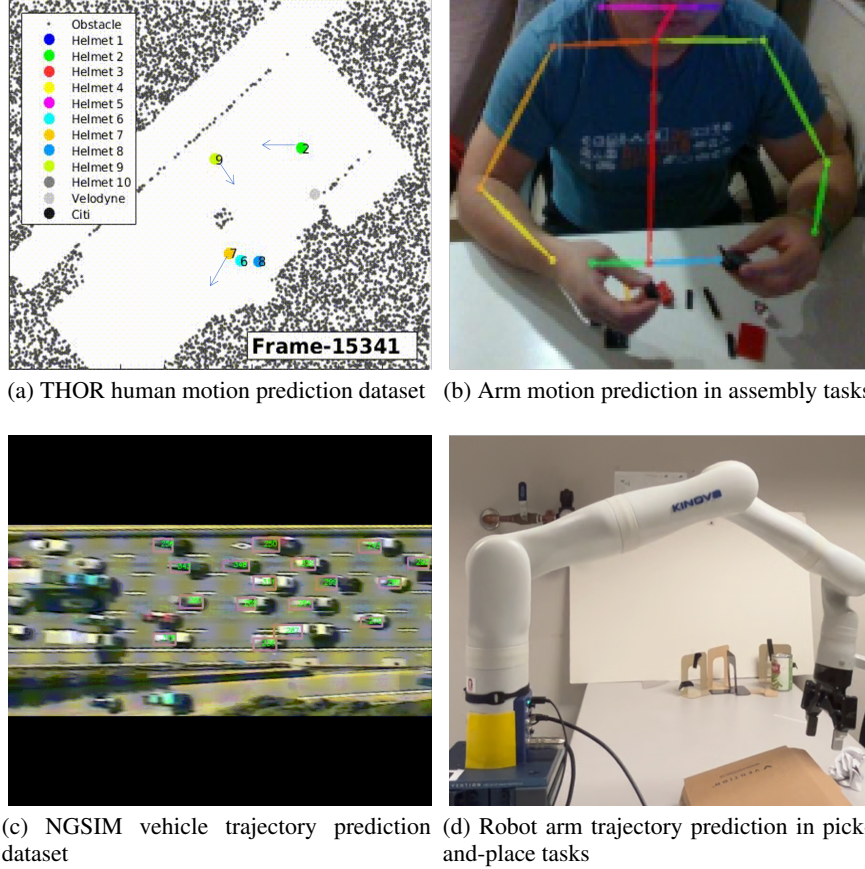

Figure 1: Illustration of tasks in different datasets. Figure (a) is copied from the public website of the THOR dataset <http://thor.oru.se/>; Figure (b) is copied from the website of the Assembly dataset [https://github.com/intelligent-control-lab/Human\\_Assembly\\_Data](https://github.com/intelligent-control-lab/Human_Assembly_Data); Figure (c) is copied from the public website of the NGSIM dataset <https://data.transportation.gov/Automobiles/Next-Generation-Simulation-NGSIM-Program-I-80-Vide/2577-gpny>; Figure (d) shows a KINOVA robot arm performing pick-and-place tasks in our dataset.

THOR and Assembly datasets to 20Hz. For these datasets, we set the input horizon to 20 and the prediction horizon to 40. The NGSIM dataset has a sampling frequency of 15Hz, so we adjusted the input horizon to 15 and the prediction horizon to 30 accordingly. As for the Robot arm trajectory dataset, we subsampled it to a sampling frequency of 25Hz and set the input horizon to 25 and the prediction horizon to 50.

## D.2 Stationarity test of datasets

As discussed in Appendix C, we use the ADF method to test the stationarity of the time-series data and check the slow-varying property of its transition function. If the p-value of the ADF test is less than 0.05, we can reject the null hypothesis and conclude that the time series is stationary. If the p-value of the ADF test is greater than 0.05, we cannot reject the null hypothesis and conclude that the time series is non-stationary.

The results of the ADF test are shown Table 1. It can be observed that the original raw series of the THOR and Assembly datasets exhibit stationarity, indicating that the transition function of these datasets is slow time-varying. Therefore, feedforward adaptation can be directly applied to the THOR and Assembly datasets. On the other hand, the original raw series of the NGSIM and Robot arm datasets are non-stationary, but the difference series demonstrates stationarity. This implies that



Table 1: ADF test results for raw time-series and the difference signal on Thor, Assembly, NGSIM, Robot arm datasets.

| Dataset               | THOR              | Assembly          | NGSIM                | Robot arm            |
|-----------------------|-------------------|-------------------|----------------------|----------------------|
| P value on Raw Series | 5e-3 (stationary) | 4e-3 (stationary) | 0.34 (nonstationary) | 0.09 (nonstationary) |
| P value on Difference | 1e-20             | 7e-21             | 0 (stationary)       | 0.008 (stationary)   |

the transition function of the difference signal for the NGSIM and Robot arm datasets is slow time-varying. Consequently, feedforward adaptation can be applied to the difference series in NGSIM and Robot arm datasets, which is equivalent to predicting velocity instead of the raw trajectory.

### D.3 Experimental design

**Parameterized Prediction models.** We utilize a Multi-layer Perceptron (MLP) with a direct multistep (DMS) prediction strategy [7]. The choice of MLP with DMS is motivated by the superior performance of a simple MLP over many larger Transformer-based models, as reported in [7]. Our MLP architecture consists of two layers. The first layer can be considered as an Encoder, denoted as  $X_t = W \cdot X_t$ . Following the encoder, the MLP incorporates layer normalization, an activation function, and a final linear projection represented as  $Y_{t+1} = V \cdot \text{Relu}(\text{LayerNorm}(X_t))$ . The layer normalization and the final projection can be viewed as a decoder. It is worth noting that we do not flatten the input for the MLP. The expression  $X_t = W \cdot X_t$  represents a linear layer applied along the temporal axis.

**Baselines.** We compare the proposed method with four baselines.

- **w/o adapt** directly conduct prediction without adaptation. Which is a lower bound for adaptation methods.
- **Feedback adaptation** selected the latest sample to optimize the model [8]. Which is the most important baseline for us.
- **Random adaptation** is the same as the Experience Replay with Reservoir Sampling [9]. Which is a method that selects the critical pair from the  $L$ -size buffer with random sampling.
- **Full adaptation** is a method that uses all samples from the buffer to adapt the model, which is similar to offline training.

**Hyperparameters.** For offline training, we follow the strategy in [7]. In adaptation, we set the learning rate of SGD as  $\eta = 0.001$ . Buffer size for feedforward adaptation is  $L = 1000$ . For uncertainty estimation, we set  $\tilde{\delta} = 0, \tilde{K} = 1$ .

### D.4 Prediction output and Prediction Error

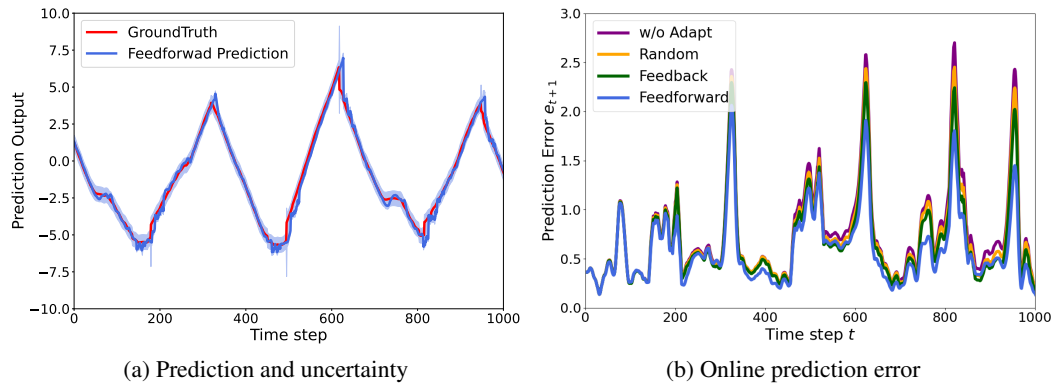

Figure 2: Experimental results on THOR dataset.

Figure 2a shows the prediction output (blue curve), ground truth label (red curve), and uncertainty estimation (blue dashed region) on the THOR dataset. Figure 2b shows the real prediction error

for different adaptation methods over time. Notably, feedforward adaptation exhibits the lowest prediction error among them.

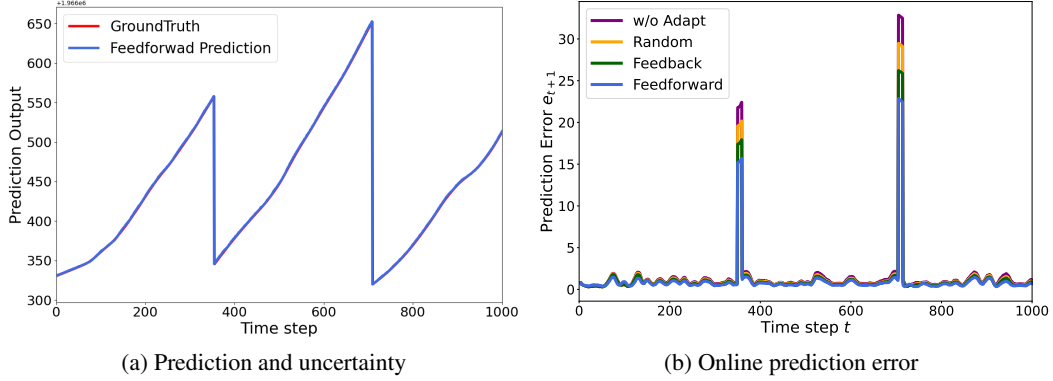

Figure 3: Experimental results on NGSIM dataset.

Figure 3a shows the prediction output (blue curve), ground truth label (red curve), and uncertainty estimation (blue dashed region) on the NGSIM dataset. Figure 3b shows the real prediction error for different adaptation methods over time. Notably, feedforward adaptation exhibits the lowest prediction error among them.

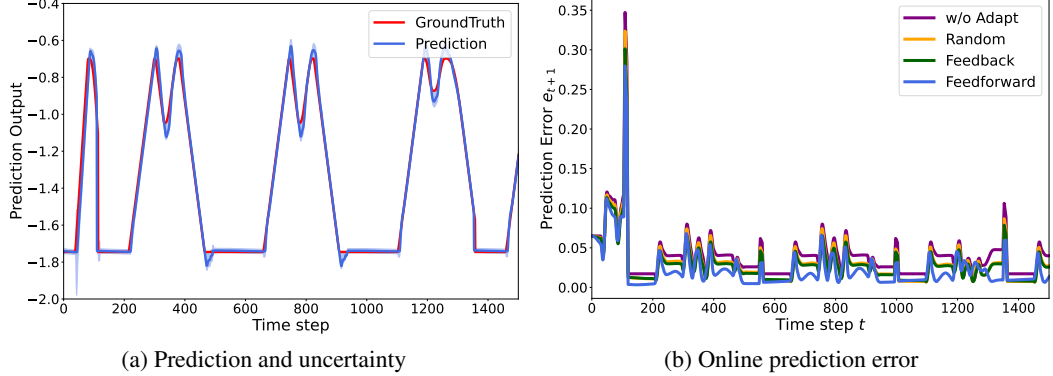

Figure 4: Experimental results on Robot arm dataset.

Figure 4a shows the prediction output (blue curve), ground truth label (red curve), and uncertainty estimation (blue dashed region) on the Robot arm dataset. Figure 4b shows the real prediction error for different adaptation methods over time. Notably, feedforward adaptation exhibits the lowest prediction error among them.

## D.5 Study of the sample selection strategy of different adaptation methods

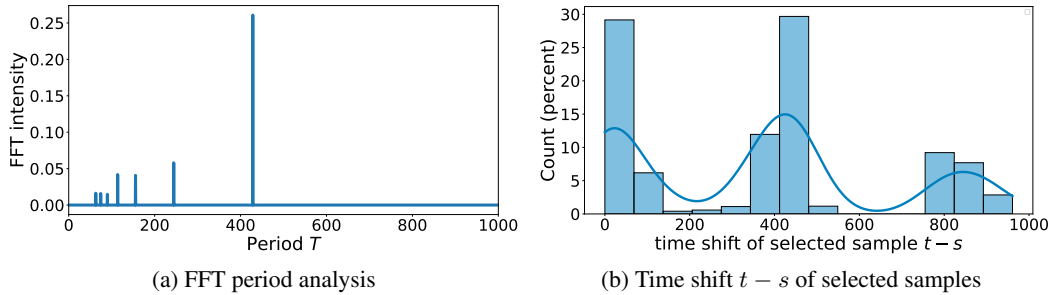

Figure 5: Experimental results on Robot arm dataset. (a) FFT period analysis. (b) Timeshift  $t - s$  between current sample  $X_t$  and selected sample  $X_s$  in feedforward adaptation.



Feedforward adaptation selects samples with the smallest sample difference  $\min_{X_i} |X_t - X_i|$ . This selection strategy allows feedforward adaptation to inherently capture the periodicity in time-series data when faced with periodic patterns. In the case of the robot arm dataset, as depicted in Figure 4a, we observe an approximate periodicity of  $T \approx 420$ . This is evident from the FFT (Fast Fourier Transform) period analysis depicted in Figure 5a. In Figure 5b, we demonstrate how many samples were chosen from  $(t - s) \approx 420$  steps earlier during the feedforward compensation process, aligning with the repetition period of  $T \approx 420$ . Feedforward adaptation’s selection of the most similar samples to the current sample facilitates the extraction of hidden periodic patterns within the input signal over time. Consequently, the distribution of  $t - s$  exhibits similarity to the FFT period analysis.

## References

- [1] Z. Allen-Zhu, Y. Li, and Z. Song. A convergence theory for deep learning via over-parameterization. In *International Conference on Machine Learning*, pages 242–252. PMLR, 2019.
- [2] R. Pyke. Spacings. *Journal of the Royal Statistical Society: Series B (Methodological)*, 27(3): 395–436, 1965.
- [3] D. A. Dickey and W. A. Fuller. Distribution of the estimators for autoregressive time series with a unit root. *Journal of the American statistical association*, 74(366a):427–431, 1979.
- [4] R. J. Hyndman and G. Athanasopoulos. *Forecasting: principles and practice*. OTexts, 2018.
- [5] A. Rudenko, T. P. Kucner, C. S. Swaminathan, R. T. Chadalavada, K. O. Arras, and A. J. Lilien-thal. Thör: Human-robot navigation data collection and accurate motion trajectories dataset. *IEEE Robotics and Automation Letters*, 5(2):676–682, 2020.
- [6] J. Colyar and J. Halkias. Us highway 101 dataset. *Federal Highway Administration (FHWA), Tech. Rep. FHWA-HRT-07-030*, 2007.
- [7] A. Zeng, M. Chen, L. Zhang, and Q. Xu. Are transformers effective for time series forecasting? *arXiv preprint arXiv:2205.13504*, 2022.
- [8] A. Abuduweili and C. Liu. Robust nonlinear adaptation algorithms for multitask prediction networks. *International Journal of Adaptive Control and Signal Processing*, 35(3):314–341, 2021.
- [9] A. Chaudhry, M. Rohrbach, M. Elhoseiny, T. Ajanthan, P. K. Dokania, P. H. Torr, and M. Ran-zato. On tiny episodic memories in continual learning. *arXiv preprint arXiv:1902.10486*, 2019.
